# Supplementary material for: Potential Analysis and Preparation of Chitosan Oligosaccharides as Oral Nutritional Supplements of Cancer Adjuvant Therapy
Source: MDPI journal article supplement (doi:10.3390/ijms20040920), 2019-02-20
Supplement: s1 [file s1]

The pinocytosis of COS by macrophages was observed by fluorescence microscope. The results showed that FITC-COS could be phagocytosed by macrophages. With the prolonged period, the fluorescence intensity enhanced. The results were shown in **Figure S1**.

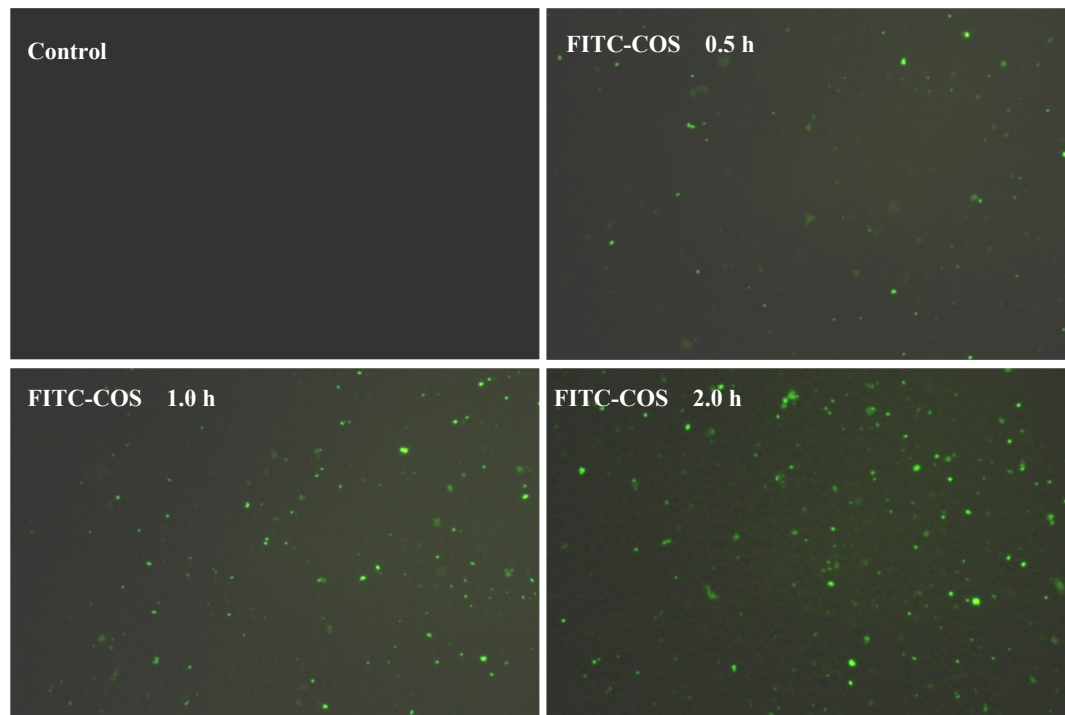

**Figure S1.** FITC-COS pinocytosis by macrophages. FITC-COS (0.5 mg/ml) in PBS was added to macrophages for different time of co-incubation. After co-incubation at different time intervals, cells were washed with PBS for three times and were observed with Nikon fluorescence microscope.

The original tumor size photos were shown in **Figure S2**.

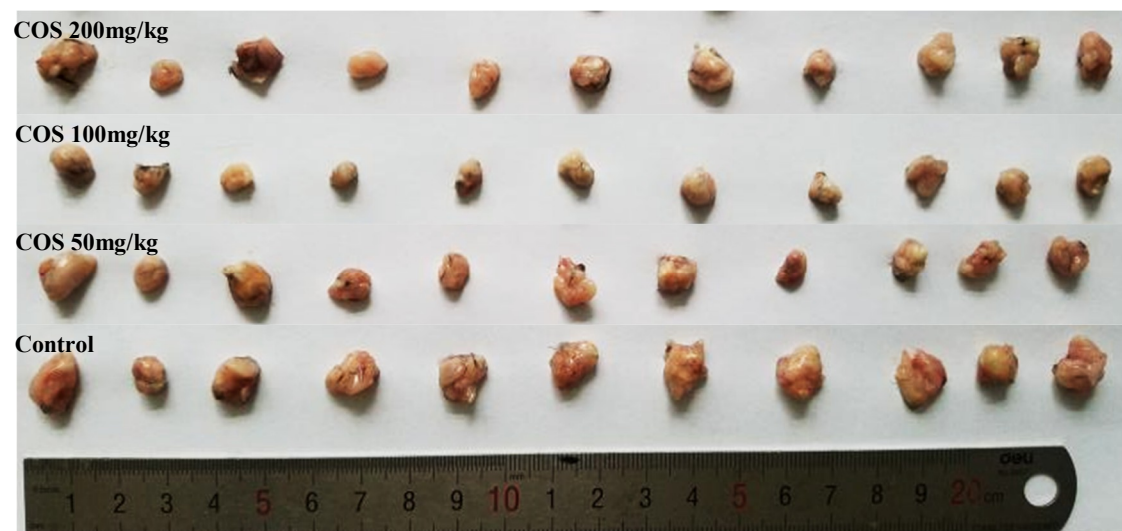

**Figure S2.** The photos of original tumor size.
